# Supplementary material
Source: PubMed Central journal article supplement (PMC3281683)
Supplement: supp_M111.288324_jbc.M111.288324-3.pdf [file supp_M111.288324_jbc.M111.288324-3.pdf]

### SUPPLEMENTARY DATA 3

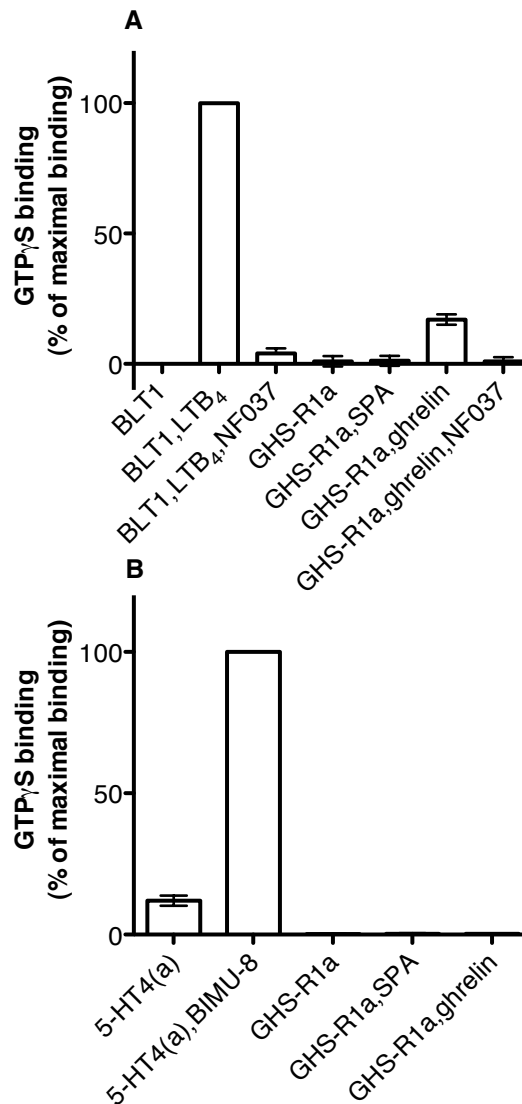

**GHS-R1a-catalyzes Gi activation in an agonist-dependent way.** (A) BODIPY FL GTP $\gamma$ S binding to G $\alpha$ i<sub>2</sub> induced either by the G $\alpha$ i-coupled BLT1 receptor in the absence of ligand, in the presence of its full agonist LTB<sub>4</sub>, or in the presence of LTB<sub>4</sub> and the G $\alpha$ i inhibitor NF037 (1), or by the ghrelin receptor in the absence of ligand, in the presence of the inverse agonist SPA, in the presence of the full agonist ghrelin, or in the presence of ghrelin and the G $\alpha$ i inhibitor NF037. Data are normalized to the maximum change induced by BLT1 in the presence of LTB<sub>4</sub> and represent the mean value  $\pm$  SD of three independent measurements. (B) BODIPY FL GTP $\gamma$ S binding to G $\alpha$ s protein induced either by the G $\alpha$ s-coupled serotonin receptor 5-HT4(a) in the absence of ligand or in the presence of its full agonist BIMU-8, or by the ghrelin receptor in the absence of ligand, in the presence of SPA, or in the presence of ghrelin. Data are normalized to the maximum change induced by 5-HT4(a) in the presence of BIMU-8 and represent the mean value  $\pm$  SD of three independent measurements.

#### Reference

(1) Freissmuth M, Boehm S, Beindl W, Nickel P, Ijzerman AP, Hohenegger M, Nanoff C. (1996). *Mol Pharmacol.* **49**, 602-611.
