# Supplementary material
Source: PubMed Central journal article supplement (PMC3281683)
Supplement: supp_M111.288324_jbc.M111.288324-4.pdf [file supp_M111.288324_jbc.M111.288324-4.pdf]

#### SUPPLEMENTARY DATA 4

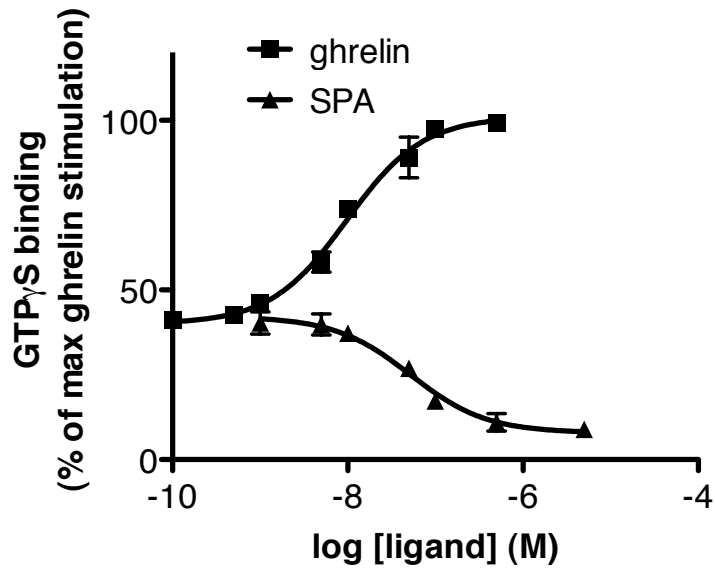

**Dose-response variations in ghrelin-stimulation and SPA-inhibition of Gq activation.** BODIPY FL GTP $\gamma$ S binding to G $\alpha$ q protein induced by GHS-R1a-containing discs in the presence of increasing concentration in ghrelin or SPA. Data are presented as the percentage of maximum BODIPY FL fluorescence change measured in the presence of ghrelin and represent the mean value  $\pm$  SD from three independent experiments.
