# Supplementary material
Source: PubMed Central journal article supplement (PMC3281683)
Supplement: supp_M111.288324_jbc.M111.288324-5.pdf [file supp_M111.288324_jbc.M111.288324-5.pdf]

## SUPPLEMENTARY DATA 5

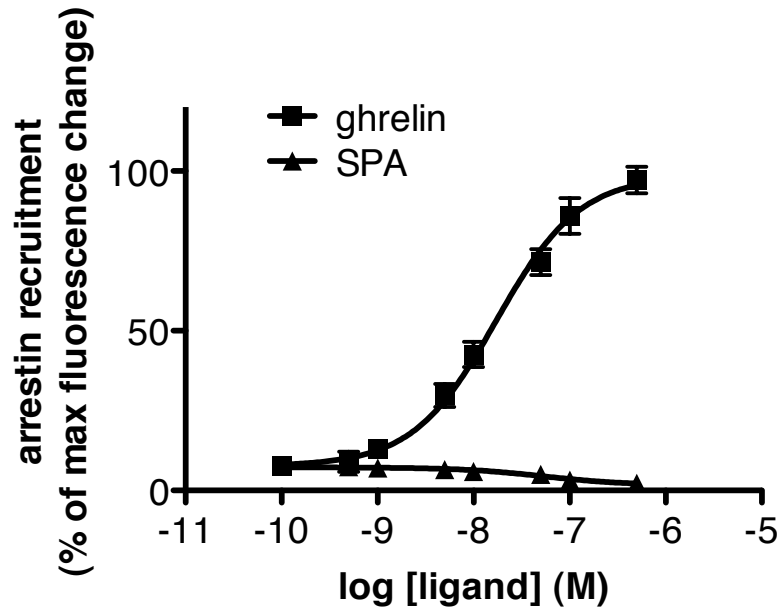

**Ghrelin induces arrestin-2 recruitment to the GHS-R1a receptor in a concentration dependent manner.** Changes in bimane emission intensity of labeled arrestin-2 induced by GHS-R1a in the presence of increasing concentrations in ghrelin or SPA. Data are presented as the percentage of maximum bimane fluorescence change measured in the presence of ghrelin and represent the mean value  $\pm$  SD from three independent experiments.
