# Supplementary material
Source: PubMed Central journal article supplement (PMC3281683)
Supplement: supp_M111.288324_jbc.M111.288324-6.pdf [file supp_M111.288324_jbc.M111.288324-6.pdf]

## SUPPLEMENTARY DATA 6

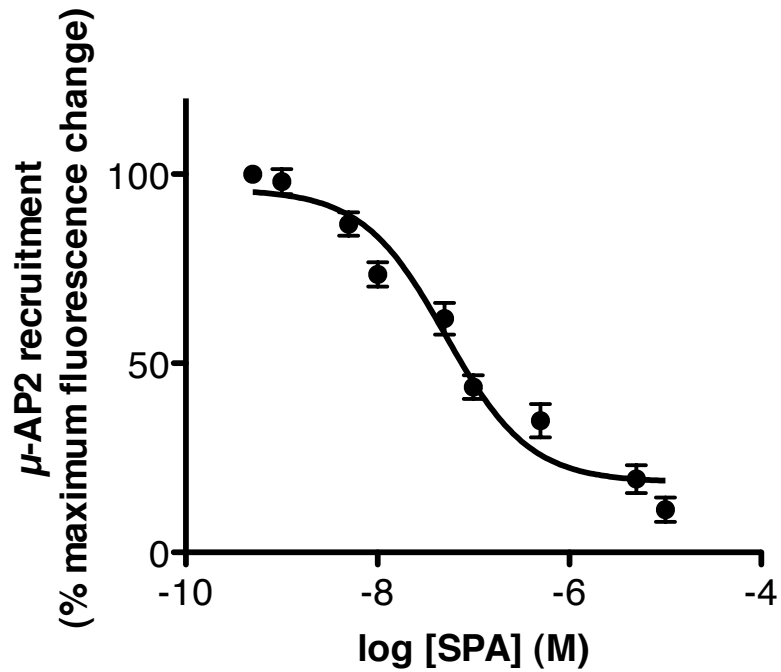

**SPA dissociates the GHS-R1a: $\mu$ -AP2 complex in a concentration dependent manner.** Changes in bimznr emission intensity of labeled  $\mu$ AP-2 induced by GHS-R1a in the presence of increasing concentrations in SPA. Data are presented as the percentage of maximum bimane fluorescence change measured in the presence of ghrelin and represent the mean value  $\pm$  SD from three independent experiments.
