# Supplementary material
Source: PubMed Central journal article supplement (PMC3281683)
Supplement: supp_M111.288324_jbc.M111.288324-7.pdf [file supp_M111.288324_jbc.M111.288324-7.pdf]

## SUPPLEMENTARY DATA 7

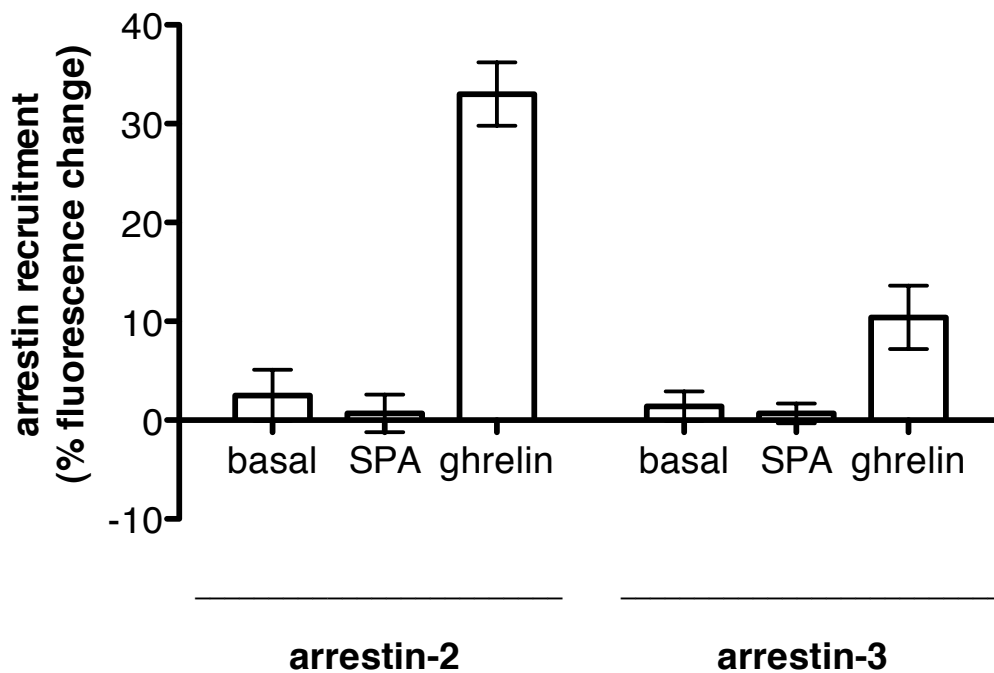

**Ghrelin activation of the purified GHS-R1a triggers arrestin-2 and arrestin-3 recruitment.** Changes in emission intensity of bimane-labeled arrestin-2(R169E) and arrestin-3(R170E) induced by GHS-R1a in the absence of ligand, in the presence of the inverse agonist SPA, or in the presence of the full agonist ghrelin. The (R169E) and (R170E) mutants of arrestin-2 and arrestin-3, respectively, interact with purified GPCRs in a phosphorylation-independent manner (1). Data are presented as the percentage of fluorescence change and represent the mean value  $\pm$  SD from three independent experiments. The percentage of fluorescence change was calculated as follows:  $I-I(0)/I(0) \times 100$ , where  $I$  is the maximum emission intensity under the conditions considered and  $I(0)$  is the maximum emission intensity of bimane attached to arrestin in the absence of the receptor.

### Reference

(1) Celver, J., Vishnivetskiy, S.A., Chavkin, C., and Gurevich, V.V. (2002). *J. Biol. Chem.* **277**:9043-9048.
